# Supplementary material for: Wogonin Induces Reactive Oxygen Species Production and Cell Apoptosis in Human Glioma Cancer Cells
Source: Int J Mol Sci. 2012 Aug 8;13(8):9877–92. doi: 10.3390/ijms13089877 (PMC3431834; doi:10.3390/ijms13089877)

# Wogonin Induces Reactive Oxygen Species Production and Cell Apoptosis in Human Glioma Cancer Cells

## Supplementary Information

**Figure S1.** Wogonin does not affect ROS generation in human primary astrocytes. Cells were incubated with wogonin (25  $\mu$ M) for indicated time periods (5, 10, 30, 60 or 120 min). ROS generation was determined using the fluorescence probes H<sub>2</sub>DCFH-DA. The production of ROS was examined by flow cytometry. Results of control and wogonin-treated (120 min) group were merged in lower panel.

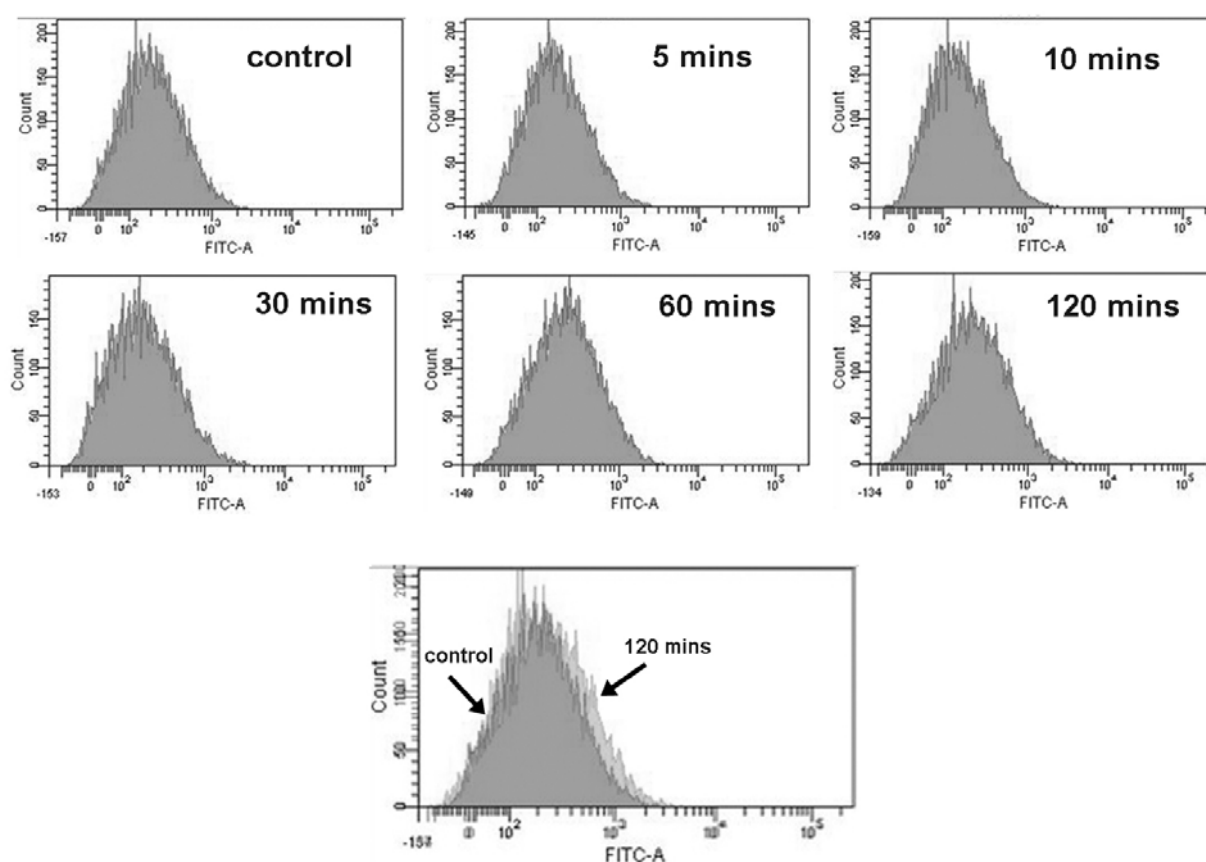

Supplement: Supplementary file 1 [file ijms-13-09877-s001.pdf]
